# Supplementary material for: The initiation of nocturnal dormancy in Synechococcus as an active process
Source: PubMed Central journal article supplement (PMC4494158; doi:10.1186/s12915-015-0144-2), 2015-06-10
Supplement: 12915_2015_144_MOESM2_ESM.pdf [file 12915_2015_144_MOESM2_ESM.pdf]

**Table S1.** Information of the targeted genes used for Figures 1A, Figure 2B-C and Additional file 2: Figure S2.

| <b>ID_REF</b>        | <b>7942_ID</b>             | <b>6301_ID</b>   | <b>SYMBOL</b>              | <b>DESCRIPTION</b>                                   |
|----------------------|----------------------------|------------------|----------------------------|------------------------------------------------------|
| syc0089-m_at         | Synpcc7942_1630            | syc0089_d        | <i>petJ</i>                | cytochrome c553                                      |
| syc0335-m_at<br>m_at | 0336- Synpcc7942_1217/1216 | syc0333_d/0334_d | <i>kaiB/kaiC</i><br>operon | circadian clock protein<br>KaiB/KaiC                 |
| syc0754-m_at         | Synpcc7942_0790            | syc0747_d        | <i>rbp3</i>                | RRM-type RNA-binding protein                         |
| syc0646-m_at         | Synpcc7942_0900            | syc0640_d        | <i>gjfA</i>                | glutamine synthetase inactivating factor             |
| syc1717-m_at         | Synpcc7942_2401            | syc1704_d        | <i>hspA</i>                | 16.6 kDa small heat shock protein molecular chaperon |
| syc1272-m_at         | Synpcc7942_0253            | syc1260_d        | -                          | hypothetical protein                                 |
