# Supplementary material for: The initiation of nocturnal dormancy in Synechococcus as an active process
Source: PubMed Central journal article supplement (PMC4494158; doi:10.1186/s12915-015-0144-2), 2015-06-10

**A**

— Light    — Light+DCMU  
 — Dark    — Light+DBMIB

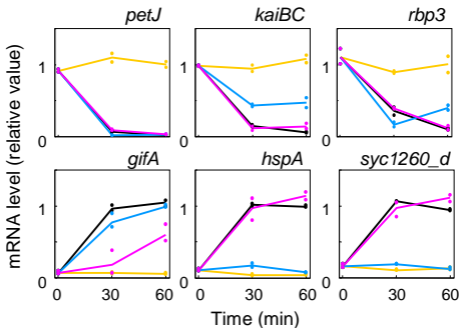**B**

— Light    — Dark + DBMIB  
 — Dark    — Dark + DBMIB + Rif

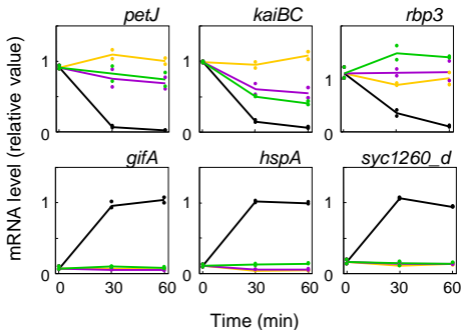

Supplement: 12915_2015_144_MOESM4_ESM.pdf [file 12915_2015_144_MOESM4_ESM.pdf]
