# Supplementary material for: The initiation of nocturnal dormancy in Synechococcus as an active process
Source: PubMed Central journal article supplement (PMC4494158; doi:10.1186/s12915-015-0144-2), 2015-06-10

A

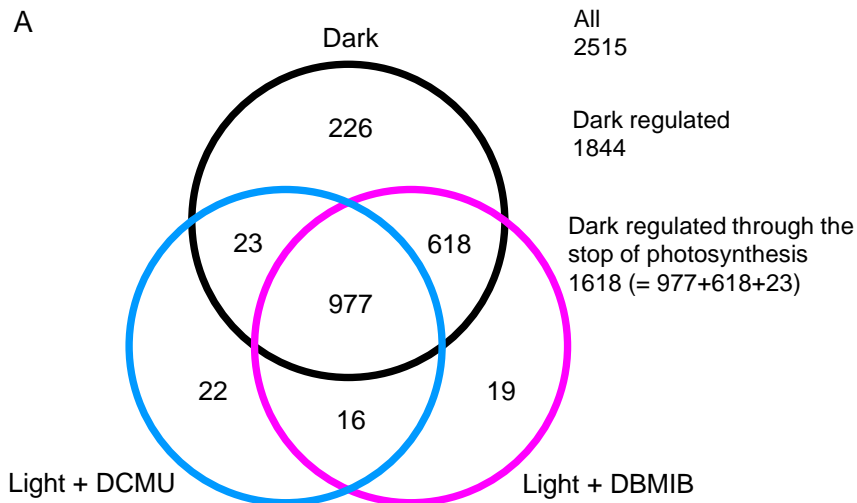

B

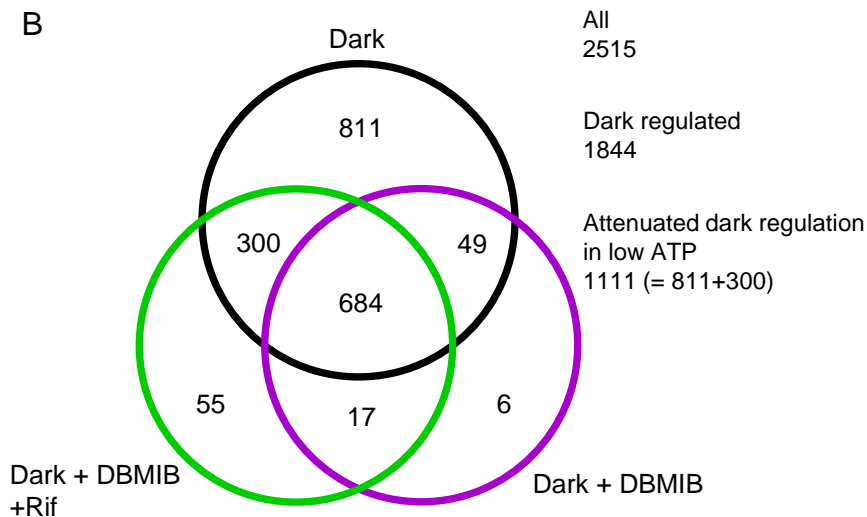

Supplement: 12915_2015_144_MOESM6_ESM.pdf [file 12915_2015_144_MOESM6_ESM.pdf]
